# Supplementary material
Source: PubMed Central journal article supplement (PMC3980008)

Supplemental Figure 1. Relationship between Free Testosterone level and Logical Memory Delayed Recall stratified by APOE- $\epsilon$ 4 status.

A. APOE- $\epsilon$ 4 Negative

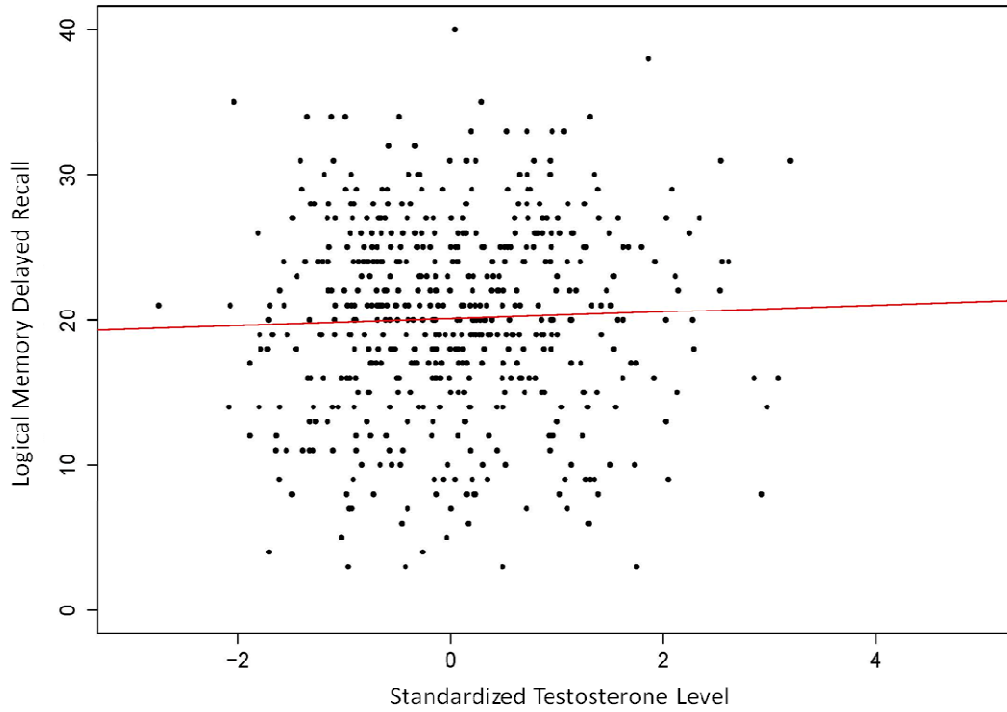

B. APOE- $\epsilon$ 4 Positive

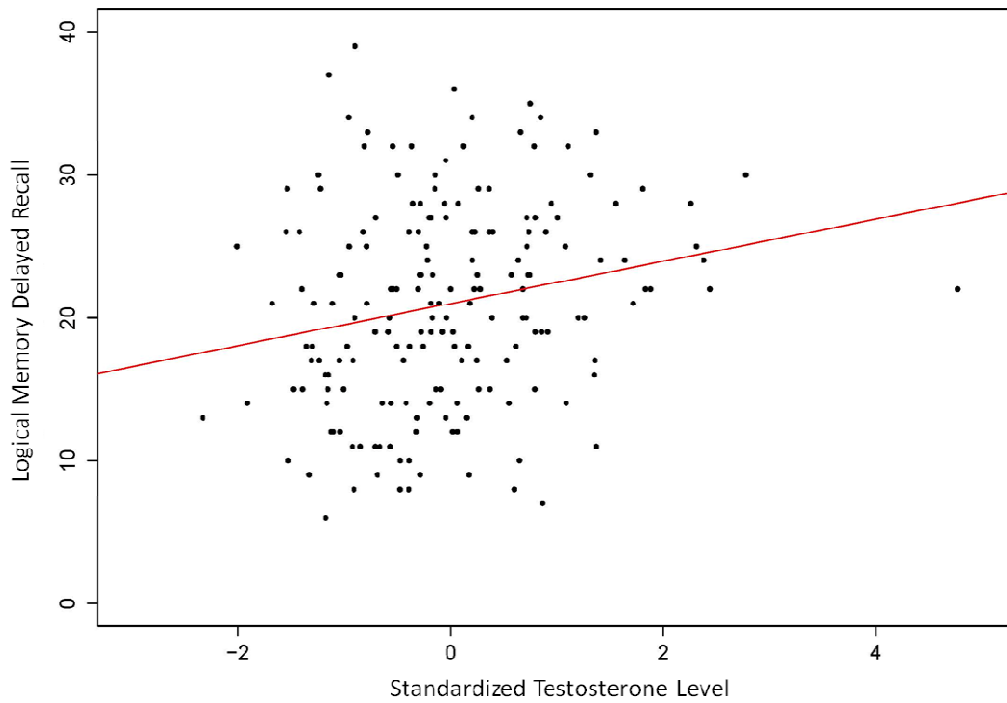

Supplement: NIHMS560395-supplement-01.pdf [file NIHMS560395-supplement-01.pdf]
